# Supplementary material for: Impact of the First COVID-19 Lockdown on Management of Pet Dogs in the UK
Source: Animals (Basel). 2020 Dec 22;11(1):5. doi: 10.3390/ani11010005 (PMC7822167; doi:10.3390/ani11010005)
Supplement: Supplementary file 1 [file animals-11-00005-s001.pdf]

Table S1: Additional demographic information about responders, their dogs and household

|                                             | Number | %    |
|---------------------------------------------|--------|------|
| <b>Respondent age group (n=4006)</b>        |        |      |
| 18-24 years                                 | 148    | 3.7  |
| 25-34 years                                 | 595    | 14.9 |
| 35-44 years                                 | 550    | 13.7 |
| 45-54 years                                 | 982    | 24.5 |
| 55-64 years                                 | 1017   | 25.4 |
| 65-74 years                                 | 590    | 14.7 |
| 75-84 years †                               | 112    | 2.8  |
| ≥85 years †                                 | 12     | 0.3  |
| <b>Number of dogs in household (n=4598)</b> |        |      |
| 1                                           | 3041   | 66.1 |
| 2                                           | 1068   | 23.2 |
| 3                                           | 310    | 6.7  |
| 4†                                          | 94     | 2.0  |
| 5†                                          | 36     | 0.8  |
| 6†                                          | 23     | 0.5  |
| 7†                                          | 13     | 0.3  |
| 8†                                          | 6      | 0.1  |
| 9†                                          | 2      | 0.04 |
| 10†                                         | 2      | 0.04 |
| >10†                                        | 3      | 0.1  |
| <b>Age category of dog (n=3945)</b>         |        |      |
| ≤6 months                                   | 33     | 0.8  |
| Juvenile                                    | 166    | 4.2  |
| Young Adult                                 | 610    | 15.5 |
| Mature Adult                                | 2033   | 51.5 |
| Senior Adult                                | 869    | 22.0 |
| Geriatric                                   | 234    | 5.9  |

\* categories not included in multivariable models due to low numbers

† these categories combined for multivariable analysis

Table S2: Isolation status of questionnaire respondent and other adult household members.

| Person                           | Status                                                                                                                                                                                       | Yes  | Percent yes |
|----------------------------------|----------------------------------------------------------------------------------------------------------------------------------------------------------------------------------------------|------|-------------|
| Respondent (n=4390)              |                                                                                                                                                                                              |      |             |
|                                  | 'self-isolating', so do not leave the house/garden at all                                                                                                                                    | 171  | 3.9         |
|                                  | leave the house for one or more of the currently recommended essential reasons (including shopping, medical appointments, exercise including dog walking, caring for vulnerable people)      | 3569 | 81.3        |
|                                  | leave the house to travel to work                                                                                                                                                            | 650  | 14.8        |
| 1 other adult in house (n=2512)  |                                                                                                                                                                                              |      |             |
|                                  | They are 'self-isolating', so do not leave the house/garden at all                                                                                                                           | 179  | 7.1         |
|                                  | They leave the house for one or more of the currently recommended essential reasons (including shopping, medical appointments, exercise including dog walking, caring for vulnerable people) | 1814 | 72.2        |
|                                  | They leave the house to travel to work                                                                                                                                                       | 519  | 20.7        |
| >1 other adult in house (n=1159) |                                                                                                                                                                                              |      |             |
|                                  | One or more adults are 'self-isolating', so do not leave the house/garden at all                                                                                                             | 85   | 7.3         |
|                                  | All other adults are 'self-isolating', so do not leave the house/garden at all                                                                                                               | 12   | 1.0         |
|                                  | Some leave the house for one or more of the currently recommended essential reasons (including shopping, medical appointments, exercise including dog walking, caring for vulnerable people) | 388  | 33.5        |
|                                  | All leave the house for one or more of the currently recommended essential reasons (including shopping, medical appointments, exercise including dog walking, caring for vulnerable people)  | 363  | 31.3        |
|                                  | Some leave the house to travel to work                                                                                                                                                       | 292  | 25.2        |
|                                  | All leave the house to travel to work                                                                                                                                                        | 19   | 1.6         |
